# Supplementary material for: Hotspot KRAS exon 2 mutations in CD166 positive colorectal cancer and colorectal adenoma cells
Source: PubMed Central journal article supplement (PMC5945530; doi:10.18632/oncotarget.24921), 2018-04-17
Supplement: oncotarget-09-20426-s001.pdf [file oncotarget-09-20426-s001.pdf]

## Hotspot *KRAS* exon 2 mutations in CD166 positive colorectal cancer and colorectal adenoma cells

### SUPPLEMENTARY MATERIALS

**Supplementary Table 1: Array layout of the human colon cancer somatic mutation PCR array**

| Array Layout |        |          |          |          |          |          |          |          |          |          |          |
|--------------|--------|----------|----------|----------|----------|----------|----------|----------|----------|----------|----------|
| APC          | APC    | APC      | APC      | APC      | APC      | APC      | APC      | APC      | APC      | APC      | APC      |
| 18852        | 13125  | 41617    | 18760    | 19203    | 18950    | 18764    | 18775    | 13113    | 18817    | 18700    | 18702    |
| APC          | APC    | APC      | APC      | APC      | APC      | APC      | APC      | APC      | APC      | APC      | APC      |
| 13129        | 41623  | 13121    | 19033    | 41619    | 18862    | 18834    | 19087    | 19088    | 18948    | 18836    | 13127    |
| APC          | APC    | APC      | APC      | APC      | APC      | APC      | APC      | APC      | APC      | BRAF     | CTNNB1   |
| 18873        | 18838  | 41618    | 19054    | 18786    | 19695    | 18561    | 13123    | 41620    | 13862    | 476      | 5675     |
| CTNNB1       | CTNNB1 | CTNNB1   | CTNNB1   | FBXW7    | KRAS     | KRAS     | KRAS     | KRAS     | KRAS     | KRAS     | KRAS     |
| 5664         | 6128   | 5667     | 5673     | 22932    | 553      | 554      | 555      | 517      | 518      | 516      | 521      |
| KRAS         | KRAS   | KRAS     | KRAS     | KRAS     | KRAS     | KRAS     | KRAS     | KRAS     | KRAS     | PIK3CA   | PIK3CA   |
| 522          | 520    | 528      | 529      | 527      | 531      | 532      | 533      | 534      | 19404    | 760      | 763      |
| PIK3CA       | PIK3CA | PIK3CA   | PIK3CA   | PIK3CA   | SRC      | TP53     | TP53     | TP53     | TP53     | TP53     | TP53     |
| 764          | 766    | 773      | 775      | 776      | 1369     | 10790    | 10690    | 10739    | 10648    | 10687    | 10645    |
| TP53         | TP53   | TP53     | TP53     | TP53     | TP53     | TP53     | TP53     | TP53     | TP53     | TP53     | TP53     |
| 10705        | 10654  | 10758    | 10812    | 6932     | 43606    | 10656    | 10662    | 10891    | 10659    | 10660    | 10863    |
| TP53         | TP53   | APC      | BRAF     | CTNNB1   | FBXW7    | KRAS     | PIK3CA   | SRC      | TP53     | SMPC     | SMPC     |
| 10704        | 10768  | 99000030 | 99000006 | 99000042 | 99000063 | 99000008 | 99000012 | 99000071 | 99000041 | 99000017 | 99000017 |

**Supplementary Table 2: Gene table of the human colon cancer somatic mutation PCR array. See Supplementary\_ Table\_2**
